# Supplementary material
Source: publisher figshare collection journal article supplement (https://sage.figshare.com/ndownloader/files/14375873)
Supplement: Supplementary file 1 [file 14375873]

## **Supporting information**

Contents:

**Fig.S1.** Effects of FeNPs on cell migration by wound-healing assay.

**Fig.S2.** Effects of FeNPs on chemotaxis of RAW264.7 cells.

**Fig.S3.** Effects of FeNPs on growth of solely cultured and co-cultured RAW264.7 and Hepa1-6 cells.

**Fig.S4.** Flow cytometry analysis of solely cultured and co-cultured RAW264.7 and Hepa1-6 cells.

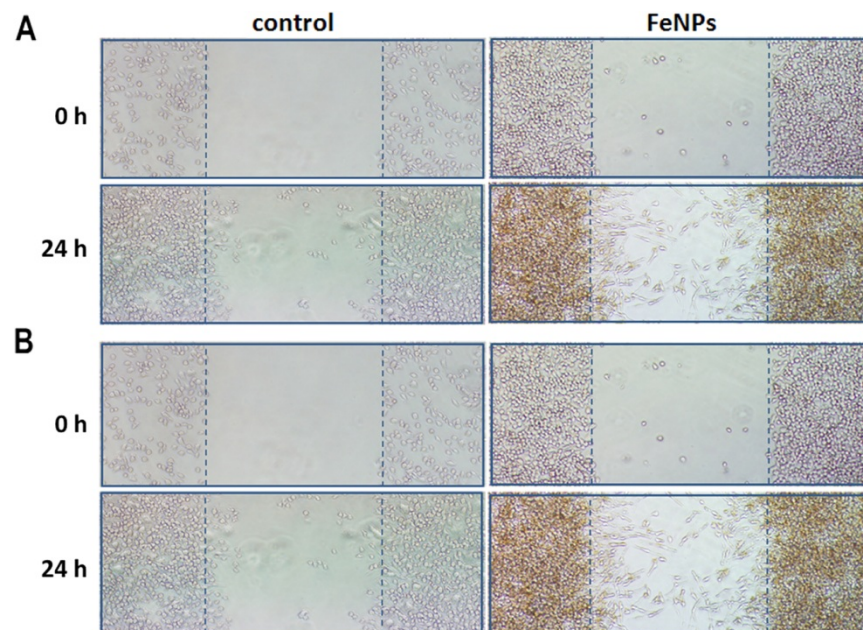

**Fig.S1.** Effects of FeNPs on cell migration by wound-healing assay. Note: three independent cell treatments were performed in this study. The results of one were showed in text as Fig.6, and those of other two (A and B) were showed as this supporting figure.

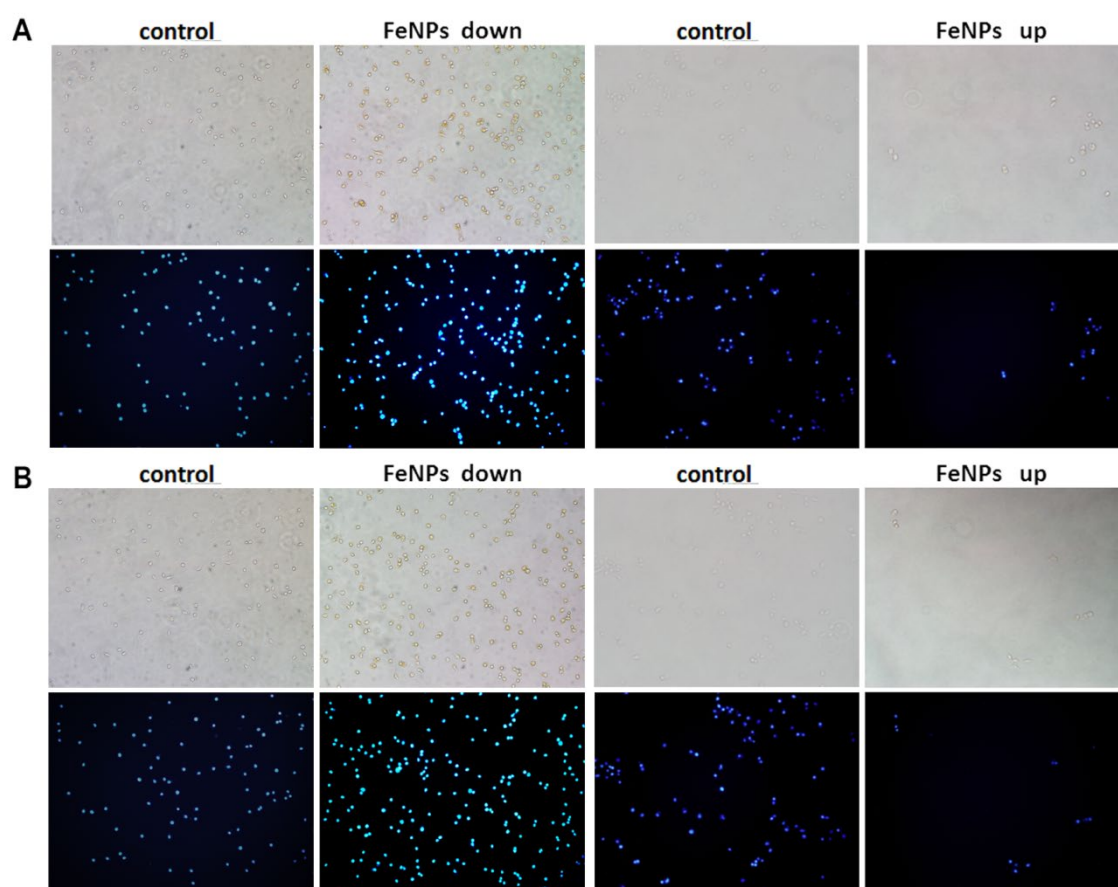

**Fig.S2.** Effects of FeNPs on chemotaxis of RAW264.7 cells. RAW264.7 cells were inoculated in transwell and FeNPs were added into culture media in transwell or microwell. Left, Microscope imaging of cells transferred to microwell in case of adding FeNPs into microwell; Right, Microscope imaging of cells transferred to microwell in case of adding FeNPs into transwell. Note: three independent cell treatments were performed in this study. The results of one were showed in text as Fig.7, and those of other two (A and B) were showed as this supporting figure.

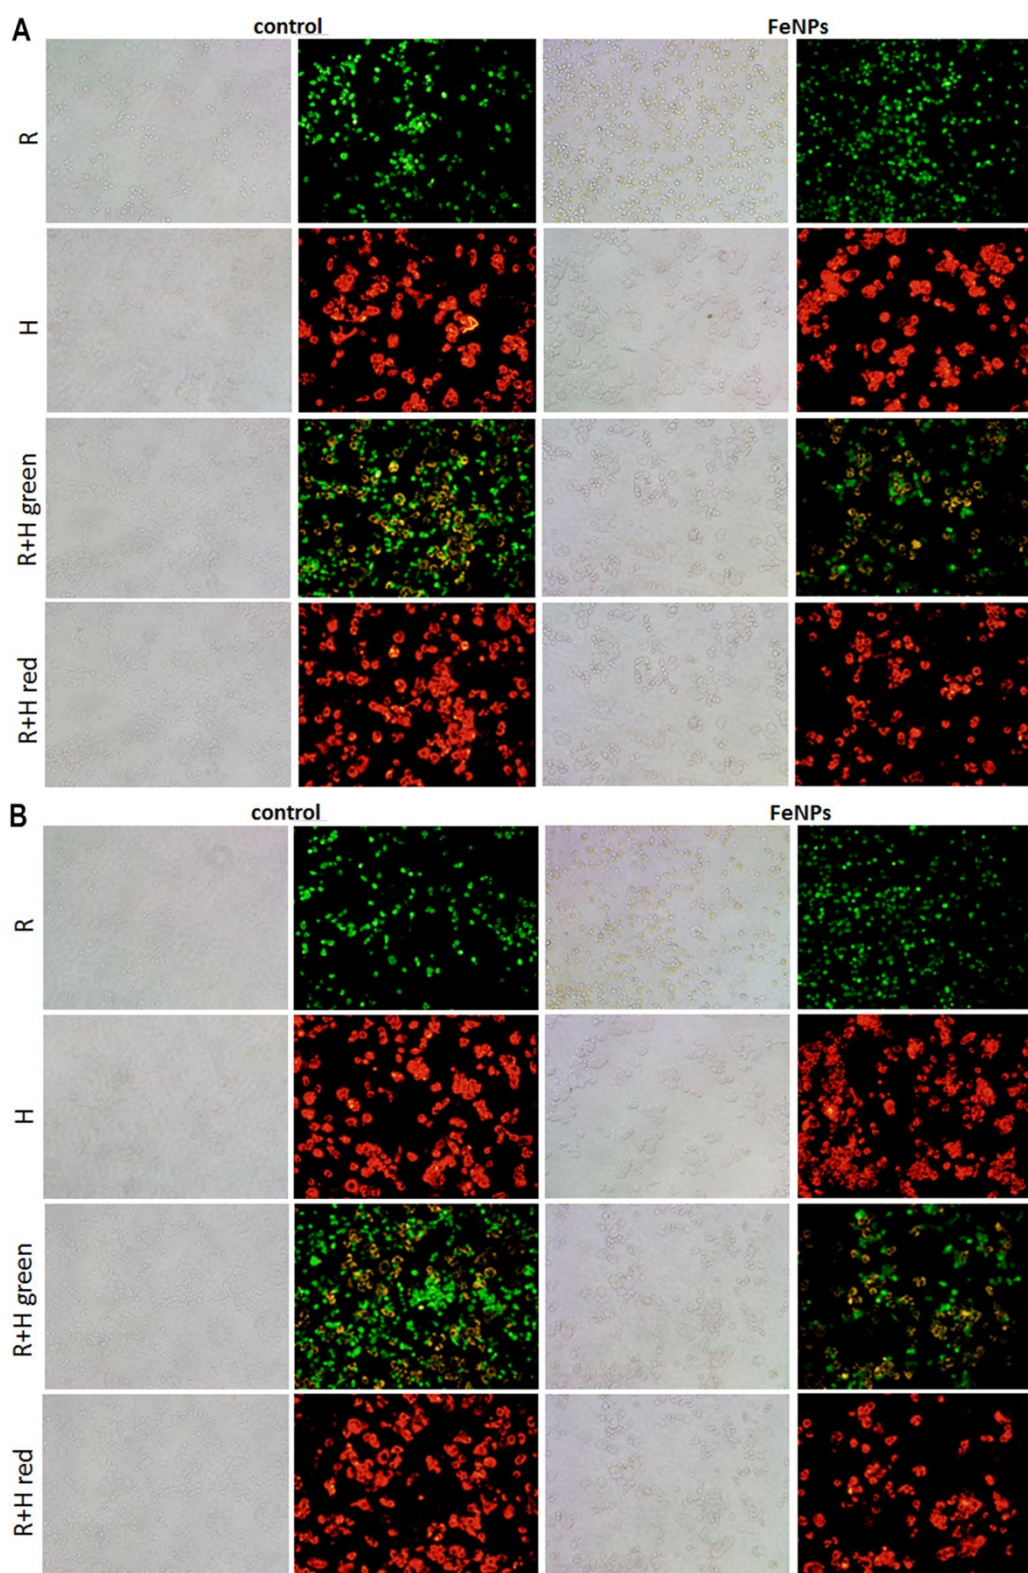

**Fig.S3.** Effects of FeNPs on growth of solely cultured and co-cultured RAW264.7 and Hepa1-6 cells. Cells were imaged with a fluorescence microscope in bright fields and at green and red fluorescence channels. R, RAW264.7 cells; H, Hepa1-6 cells; R+H, co-cultured RAW264.7 and Hepa1-6 cells; RAW264.7 cells were pre-stained with Calcein, AM, while Hepa1-6 cells were pre-stained by CM-DiI dye. Note: three independent cell treatments were performed in this study. The results of one were showed in text as Fig.8, and those of other two (A and B) were showed as this supporting figure.



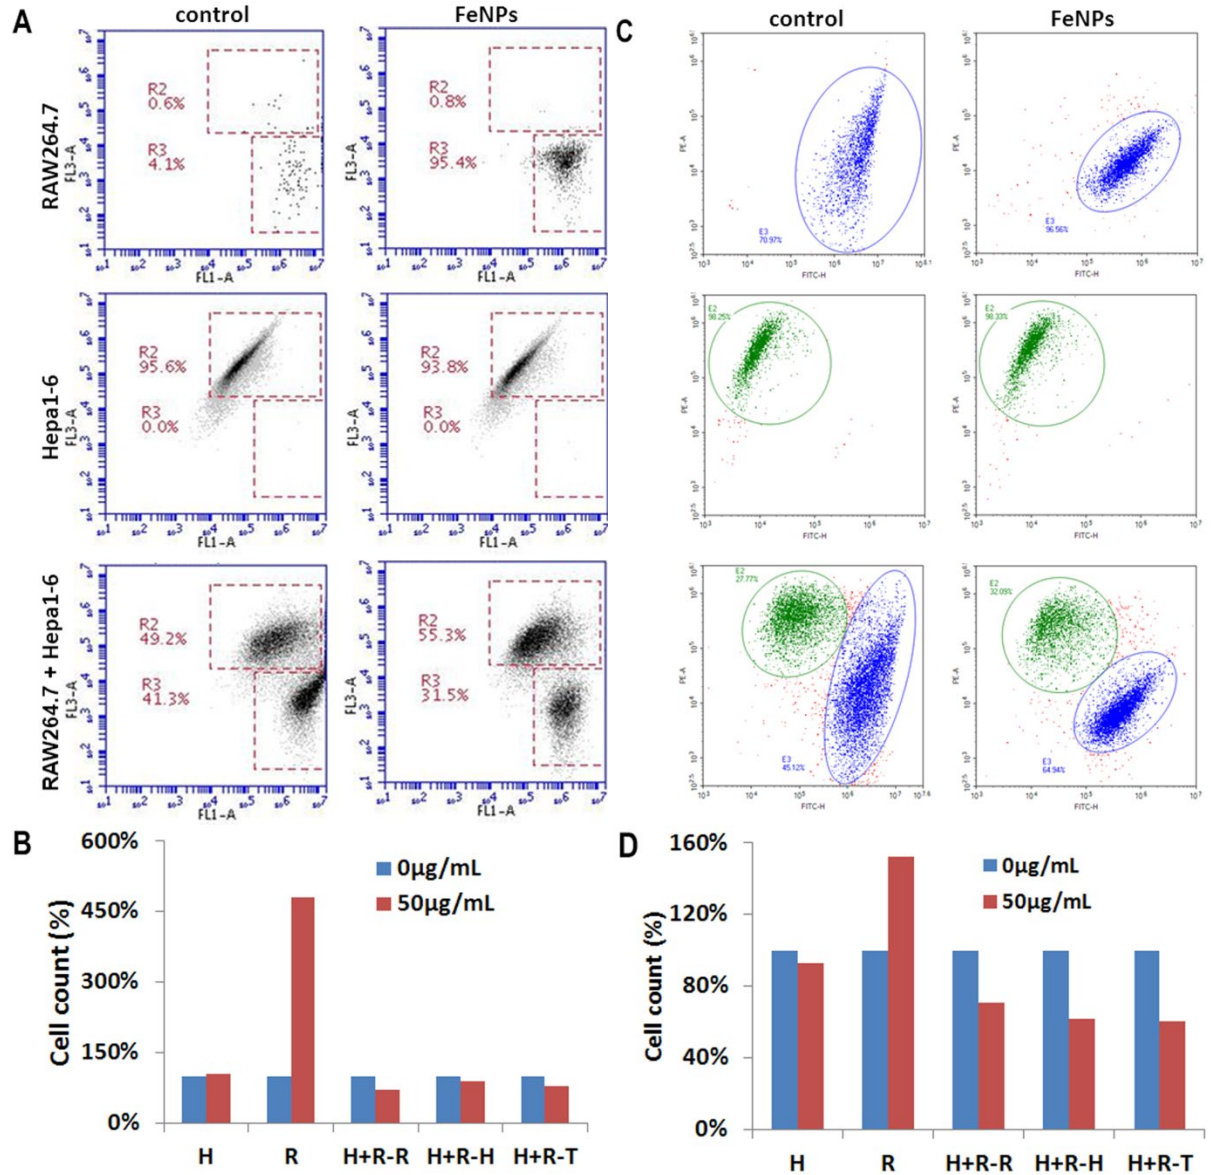

**Fig.S4.** Flow cytometry analysis of solely cultured and co-cultured RAW264.7 and Hepa1-6 cells. A and C, Scatter plots of flow cytometry analyses by using BDAccuri C6; B and D, Quantitative statistical results of flow cytometry analysis. \*  $p < 0.05$ . R, RAW264.7 cells; H, Hepa1-6 cells; R+H, co-cultured RAW264.7 and Hepa1-6 cells. Note: three independent cell treatments and flow cytometry analyses were performed in this study. The results of one were showed in text as Fig.9, and those of other two (A and C) were showed as this supporting figure. In these two more biological replicates, each group of cells was measured with flow cytometry only one time. Therefore, no statistical test was performed.
